# Supplementary material
Source: ML conference proceedings conference paper supplement (https://proceedings.mlr.press/v119/grasshoff20a.html)
Supplement: Supplementary file [file grasshoff20a-supp.pdf]

---

# Supplementary Material – Scalable Gaussian Process Separation for Kernels with a Non-Stationary Phase

---

Jan Graßhoff<sup>1</sup> Alexandra Jankowski<sup>1</sup> Philipp Rostalski<sup>1</sup>

## Overview of Kronecker and Toeplitz Methods

Table 1: Structure exploiting inference and learning methods. All kernels are assumed to be stationary and  $\hat{K} = K + \sigma^2 I$ .

| Kernel and Inputs                                                                                             | Matrix                                               | Linear Solve                                                                 | Log Determinant                                                                             |
|---------------------------------------------------------------------------------------------------------------|------------------------------------------------------|------------------------------------------------------------------------------|---------------------------------------------------------------------------------------------|
| Kernel is separable:<br>$k(\mathbf{x}, \mathbf{z}') = \prod_{d=1}^D k_d(\mathbf{x}^{(d)}, \mathbf{z}'^{(d)})$ | $K = \bigotimes_{d=1}^D K_d$<br>and                  | noise-free:<br>$K^{-1}\mathbf{y} = \bigotimes_{d=1}^D K_d^{-1}\mathbf{y}$    | noise-free:<br>$\log  K  = \sum_i V_{i,i}$                                                  |
| Inputs on a rectilinear grid:<br>$X = \mathcal{X}_1 \times \dots \times \mathcal{X}_D$                        | $K = QVQ^\top$                                       | noisy:<br>$\hat{K}^{-1}\mathbf{y} = Q(V + \sigma^2 I)^{-1}Q^\top \mathbf{y}$ | noisy:<br>$\log  \hat{K}  = \sum_i (V_{i,i} + \sigma^2)$                                    |
| Kernel: $k(x, x')$<br>Inputs: $x \in \mathbb{R}$ and equispaced                                               | $K$ is Toeplitz                                      | LCG with fast MVMs                                                           | (1) circulant approx. (Wilson et al., 2015)<br>(2) stoch. trace estim. (Dong et al., 2017)  |
| Kernel is separable<br>Inputs unstructured                                                                    | $K \approx WK_UUW^\top$<br>(Wilson & Nickisch, 2015) | LCG with fast MVMs                                                           | (1) scaled eigenvalues (Wilson et al., 2015)<br>(2) stoch. trace estim. (Dong et al., 2017) |

## Structure Exploitation for Kernels with a Non-Stationary Phase

Table 2: Comparison of the standard SKI (Wilson & Nickisch, 2015) approach using equidistant inducing points  $U$  and warpSKI. Inputs may be unstructured (or have partial grid structure). The kernels  $k$  (and  $k_i$ ) are assumed to be stationary and separable. The functions  $\phi_i : \mathcal{D} \rightarrow \mathcal{D}_i$  and  $\phi : \mathcal{D} \rightarrow \mathcal{D}_1$  with  $\mathcal{D}_{\text{in}} \subseteq \mathbb{R}^D$ ,  $\mathcal{D}_i \subseteq \mathbb{R}^D$  are invertible functions. The linear solve  $\hat{K}^{-1}\mathbf{y}$  is done by conjugate gradients and the log determinant is approximated using stochastic trace estimation.

| Kernel                                                                                                                   | equidistant $U$ recovers...      | warpSKI recovers...                        |
|--------------------------------------------------------------------------------------------------------------------------|----------------------------------|--------------------------------------------|
| $k(\phi(x), \phi(x'))$<br>with $x \in \mathbb{R}$                                                                        | –                                | Toeplitz structure                         |
| $\sum_i k_i(\phi_i(x), \phi_i(x'))$<br>with $x \in \mathbb{R}$                                                           | –                                | sum over Toeplitz structures               |
| $k(\phi(\mathbf{x}), \phi(\mathbf{x}'))$ ,<br>$\mathbf{x} \in \mathbb{R}^D$ and $\phi$ is not an elementwise fnc.        | –                                | Kronecker and Toeplitz structure           |
| $k(\phi(\mathbf{x}), \phi(\mathbf{x}'))$<br>$\mathbf{x} \in \mathbb{R}^D$ and $\phi$ is an elementwise fnc.              | Kronecker structure              | Kronecker and Toeplitz structure           |
| $\sum_i k_i(\phi_i(\mathbf{x}), \phi_i(\mathbf{x}'))$<br>$\mathbf{x} \in \mathbb{R}^D$ and $\phi_i$ are elementwise fnc. | sum over<br>Kronecker structures | sum over Kronecker and Toeplitz structures |

<sup>1</sup>Institute for Electrical Engineering in Medicine, Universität zu Lübeck, Germany. Correspondence to: Jan Graßhoff <j.grasshoff@uni-luebeck.de>.

Experimental Data - Numerical Results

Table 3: Inference runtime (s) for the numerical experiment with  $n$  data points and  $m$  inducing points. The results are averages over five samples  $\pm$  one standard deviation.

| Points          | Inducing Points |                 |                 |
|-----------------|-----------------|-----------------|-----------------|
|                 | $m = 9933$      | $m = 48824$     | $m = 74836$     |
| $n = 10^{2.75}$ | 0.11 $\pm$ 0.02 | 0.28 $\pm$ 0.05 | 0.47 $\pm$ 0.07 |
| $n = 10^3$      | 0.14 $\pm$ 0.03 | 0.43 $\pm$ 0.05 | 0.64 $\pm$ 0.08 |
| $n = 10^{3.5}$  | 0.34 $\pm$ 0.06 | 1.10 $\pm$ 0.10 | 1.61 $\pm$ 0.17 |
| $n = 10^4$      | 1.95 $\pm$ 0.48 | 3.80 $\pm$ 0.68 | 4.76 $\pm$ 0.89 |
| $n = 10^{4.5}$  | 19.9 $\pm$ 4.4  | 25.8 $\pm$ 3.7  | 26.3 $\pm$ 4.7  |
| $n = 10^5$      | 214 $\pm$ 44    | 228 $\pm$ 37    | 241 $\pm$ 49    |

Table 4: Likelihood evaluation time (s) for the numerical experiment with  $n$  data points and  $m$  inducing points. The results are averages over five samples  $\pm$  one standard deviation.

| Points          | Inducing Points |                 |                 |
|-----------------|-----------------|-----------------|-----------------|
|                 | $m = 9933$      | $m = 48824$     | $m = 74836$     |
| $n = 10^{2.75}$ | 1.81 $\pm$ 0.37 | 4.41 $\pm$ 1.34 | 8.17 $\pm$ 2.10 |
| $n = 10^3$      | 1.81 $\pm$ 0.37 | 5.74 $\pm$ 1.06 | 10.0 $\pm$ 1.7  |
| $n = 10^{3.5}$  | 1.92 $\pm$ 0.39 | 6.15 $\pm$ 1.16 | 10.9 $\pm$ 1.9  |
| $n = 10^4$      | 2.35 $\pm$ 0.48 | 6.67 $\pm$ 0.68 | 12.0 $\pm$ 2.1  |
| $n = 10^{4.5}$  | 6.19 $\pm$ 1.45 | 10.1 $\pm$ 1.7  | 14.4 $\pm$ 2.8  |
| $n = 10^5$      | 17.0 $\pm$ 3.7  | 19.8 $\pm$ 3.6  | 26.0 $\pm$ 5.2  |

Table 5: Learning runtime (s) for the numerical experiment with  $n$  data points and  $m$  inducing points. The results are averages over five samples  $\pm$  one standard deviation.

| Points          | Inducing Points |                 |               |
|-----------------|-----------------|-----------------|---------------|
|                 | $m = 9933$      | $m = 48824$     | $m = 74836$   |
| $n = 10^{2.75}$ | 28.3 $\pm$ 9.3  | 84.6 $\pm$ 40.5 | 166 $\pm$ 53  |
| $n = 10^3$      | 29.0 $\pm$ 5.3  | 94.3 $\pm$ 34.2 | 159 $\pm$ 40  |
| $n = 10^{3.5}$  | 26.6 $\pm$ 16.0 | 92.0 $\pm$ 20.8 | 177 $\pm$ 37  |
| $n = 10^4$      | 55.1 $\pm$ 7.8  | 117 $\pm$ 35    | 214 $\pm$ 33  |
| $n = 10^{4.5}$  | 130 $\pm$ 49    | 163 $\pm$ 23    | 252 $\pm$ 88  |
| $n = 10^5$      | 309 $\pm$ 110   | 458 $\pm$ 79    | 398 $\pm$ 153 |

Table 6: RMSE for the numerical experiment with  $n$  data points and  $m$  inducing points. The results are averages over five samples  $\pm$  one standard deviation.

| Points          | Inducing Points |                 |                 |
|-----------------|-----------------|-----------------|-----------------|
|                 | $m = 9933$      | $m = 48824$     | $m = 74836$     |
| $n = 10^{2.75}$ | 0.29 $\pm$ 0.02 | 0.30 $\pm$ 0.03 | 0.29 $\pm$ 0.03 |
| $n = 10^3$      | 0.28 $\pm$ 0.02 | 0.25 $\pm$ 0.03 | 0.26 $\pm$ 0.01 |
| $n = 10^{3.5}$  | 0.20 $\pm$ 0.02 | 0.19 $\pm$ 0.01 | 0.19 $\pm$ 0.01 |
| $n = 10^4$      | 0.17 $\pm$ 0.01 | 0.16 $\pm$ 0.02 | 0.16 $\pm$ 0.02 |
| $n = 10^{4.5}$  | 0.16 $\pm$ 0.03 | 0.15 $\pm$ 0.02 | 0.16 $\pm$ 0.02 |
| $n = 10^5$      | 0.15 $\pm$ 0.01 | 0.15 $\pm$ 0.02 | 0.15 $\pm$ 0.02 |

References

Dong, K., Eriksson, D., Nickisch, H., Bindel, D., and Wilson, A. Scalable log determinants for gaussian process kernel learning. In *Proceedings of the 32Nd International Conference on Neural Information Processing Systems (NeurIPS)*, pp. 6327–6337, 2017.

Wilson, A. G. and Nickisch, H. Kernel interpolation for scalable structured gaussian processes (kiss-gp). In *Proceedings of the 32Nd International Conference on International Conference on Machine Learning (ICML)*, pp. 1775–1784, 2015.

Wilson, A. G., Dann, C., and Nickisch, H. Thoughts on massively scalable gaussian processes. *CoRR*, abs/1511.01870, 2015. URL <http://arxiv.org/abs/1511.01870>.
